# Supplementary material
Source: PubMed Central journal article supplement (PMC6248094)
Supplement: jamapsychiatry-75-1189-s001.pdf [file jamapsychiatry-75-1189-s001.pdf]

## Supplementary Online Content

Scherrer JF, Salas J, Lustman P, et al. The role of obesity in the association between posttraumatic stress disorder and incident diabetes. *JAMA Psychiatry*. Published online August 8, 2018. doi:10.1001/jamapsychiatry.2018.2028

**eTable 1.** Type 2 Diabetes outcome FY 2009 to 2015, cumulative incidence % and incidence rate per 1000 person-years. Overall and by PTSD case vs. control.

**eTable 2.** Type 2 Diabetes outcome FY 2009 to 2015, stratified by PTSD status, cumulative incidence % and incidence rate per 1000 person-years by obesity.

This supplementary material has been provided by the authors to give readers additional information about their work.

**eTable 1. Type 2 Diabetes outcome FY 2009 to 2015, cumulative incidence % and incidence rate per 1000 person-years. Overall and by PTSD case vs. control. Crude and age-adjusted. (n=5,654)**

|                                                                                                                               | <b>Total n</b> | <b>T2DM events</b> | <b>Cumulative incidence %</b> | <b>Incidence rate per 1000PY</b> |
|-------------------------------------------------------------------------------------------------------------------------------|----------------|--------------------|-------------------------------|----------------------------------|
| <i>Overall</i>                                                                                                                | 5,654          | 393                | 7.0%                          | 16.2/1000PY                      |
| <b>Crude</b>                                                                                                                  |                |                    |                               |                                  |
| Non-PTSD control                                                                                                              | 2,204          | 141                | 6.4%                          | 15.5/1000PY                      |
| PTSD case                                                                                                                     | 3,450          | 252                | 7.3%                          | 16.7/1000PY                      |
| p-value <sup>a</sup>                                                                                                          | -              | -                  | .191                          | .490                             |
| <b>Age-adjusted</b>                                                                                                           |                |                    |                               |                                  |
| Non-PTSD control                                                                                                              | -              | -                  | 4.7%                          | 11.4/1000PY                      |
| PTSD case                                                                                                                     | -              | -                  | 6.6%                          | 15.2/1000PY                      |
| p-value <sup>a</sup>                                                                                                          | -              | -                  | .002                          | .008                             |
| Note: FY=Fiscal Year; T2DM = Type 2 Diabetes Mellitus; PY=person-years<br><sup>a</sup> p-value comparing PTSD Case to control |                |                    |                               |                                  |

**eTable 2. Type 2 Diabetes outcome FY 2009 to 2015, stratified by PTSD status, cumulative incidence % and incidence rate per 1000 person-years by obesity. Crude and age-adjusted. (n=5,654)**

|                                                        | Total n | T2DM events | Cumulative incidence % | Incidence rate per 1000PY |
|--------------------------------------------------------|---------|-------------|------------------------|---------------------------|
| <b><i>Non-PTSD control</i></b>                         |         |             |                        |                           |
| Crude                                                  |         |             |                        |                           |
| Not obese                                              | 1,217   | 38          | 3.1%                   | 7.5/1000PY                |
| Obese                                                  | 987     | 103         | 10.4%                  | 27.7/1000PY               |
| p-value <sup>a</sup>                                   | -       | -           | <.0001                 | <.0001                    |
| Age-adjusted                                           |         |             |                        |                           |
| Not obese                                              | -       | -           | 2.7%                   | 6.4/1000PY                |
| Obese                                                  | -       | -           | 8.1%                   | 21.2/1000PY               |
| p-value <sup>a</sup>                                   | -       | -           | <.0001                 | <.0001                    |
| <b><i>PTSD Case</i></b>                                |         |             |                        |                           |
| Crude                                                  |         |             |                        |                           |
| Not obese                                              | 1,411   | 46          | 3.3%                   | 6.8/1000PY                |
| Obese                                                  | 2,039   | 206         | 10.1%                  | 25.4/1000PY               |
| p-value <sup>a</sup>                                   | -       | -           | <.0001                 | <.0001                    |
| Age-adjusted                                           |         |             |                        |                           |
| Not obese                                              | -       | -           | 2.8%                   | 5.8/1000PY                |
| Obese                                                  | -       | -           | 8.5%                   | 21.0/1000PY               |
| p-value <sup>a</sup>                                   | -       | -           | <.0001                 | <.0001                    |
| Note: T2DM = Type 2 Diabetes Mellitus; PY=person-years |         |             |                        |                           |
| <sup>a</sup> p-value comparing obesity groups          |         |             |                        |                           |
